# Supplementary material for: CXCL13 in Cerebrospinal Fluid: Clinical Value in a Large Cross-Sectional Study
Source: MDPI journal article supplement (doi:10.3390/ijms25010425), 2023-12-28
Supplement: s1 [file s1]

**Table S1. Classification of different diseases into the 4 groups AIND, NID, NPL, and NIND.**

**Autoimmune (inflammatory/rheumatic) neurological diseases (AIND; n = 147)**

- Multiple sclerosis (n = 73)
  - Relapsing-remitting type (n = 61)
  - Secondary progressive type (n = 6)
  - Primary progressive type (n = 6)
- Clinically isolated syndrome (n = 3)
- Isolated optic neuritis (n = 18)
- Neuromyelitis optica spectrum disease (n = 4)
  - Aquaporin-4-antibody positive (n = 3)
  - Antibody-negative (n = 1)
- Autoimmune (limbic) encephalitis (n = 14)
- Paraneoplastic syndrome (other than limbic encephalitis) (n = 11)
  - Sensory neuronopathy (n = 5)
  - Sensorimotor neuropathy (n = 1)
  - Cerebellar degeneration (n = 6)
- CLIPPERS (n = 1)
- Sjögren's syndrome (neurological) (n = 1)
- CNS-vasculitis (n = 8)
  - Primary angiitis of the central nervous system (PACNS) (n = 4)
  - Parainfectious in case of hepatitis C (n = 1)
  - Unknown origin (n = 2)
  - Rheumatic with anti-nuclear antibodies (Sm) (n = 1)
- Neuro-Behçet's disease (n = 3)
  - Parenchymal type (n = 2)
  - Non-parenchymal type (n = 1)
- Neurosarcoidosis (n = 10)

## **Neuroinfectious diseases (NID; n = 273)**

### **Bacterial (n = 79)**

- Neuroborreliosis (n = 61)
  - Definitive (n = 61)
- Bacterial meningitis (n = 7)
  - Staphylococcus aureus (n = 2)
  - Streptococcus pneumoniae (n = 2)
  - Staphylococcus epidermidis (n = 1)
  - Streptococcus agalactiae (n = 1)
  - Mycobacterium tuberculosis (n = 1)
- Neurosyphilis (n = 10)
  - Definitive (n = 5)
  - Probable (n = 5)
    - Incl. HIV (n = 2)

### **Fungal/parasitic (n = 7)**

- Aspergillosis with CNS-involvement (n = 2)
- Neuroschistosomiasis (n = 1)
- Cryptococcosis with CNS-involvement (n = 4)
  - Incl. neurosarcoidosis (n = 3)
  - Incl. HIV (n = 1)

### **Viral (n = 87)**

- Varicella-zoster virus (n = 49)
- Herpes-simplex virus type 1 (n = 12)
- Epstein-Barr virus (n = 2)
- Tick-borne meningoencephalitis virus (n = 24)

### **Unknown pathogen (n = 101)**

- Neuroinfectious diseases of unknown pathogen (n = 101)

**CNS-neoplasia (NPL; n = 49)**

B-cell non-Hodgkin lymphoma (n = 21; Primary CNS lymphoma (n = 16); Secondary CNS lymphoma (n = 9))

- Diffuse large cell B-cell lymphoma (n = 14)
- Waldenstrom's macroglobulinaemia (n = 5)
- Follicular B-cell lymphoma (n = 2)
- Marginal zone lymphoma (n = 1)
- B-cell chronic lymphocytic leukemia (n = 2)
- No histology (n = 2)

T-cell non-Hodgkin lymphoma (n = 2; Secondary CNS lymphoma (n = 2))

- Cutaneous T-cell lymphoma (mycosis fungoides; n = 1)
- Primary intestinal epitheliotropic T-cell lymphoma (n = 1)

Solid brain tumor (n = 21)

- Meningioma (n = 3)
- Pilocytic astrocytoma (n = 1)
- Anaplastic astrocytoma (n = 1)
- Diffuse astrocytoma (n = 1)
- Glioblastoma (n = 12)
- Oligodendroglioma (WHO-grade II; n = 1)
- Ganglioglioma (n = 1)
- No histology (n = 1)

**Non-inflammatory neurological diseases (NIND; n = 208)**

Primary headache disorders (n = 19), idiopathic intracranial hypertension (n = 3), rheumatological diseases without CNS involvement (n = 11), Parkinsons disease (n = 3), somatoform disorders (n = 17), non-inflammatory sensomotoric polyneuropathy (n = 16), restless legs syndrome (n = 1), epilepsy/first epileptic seizure (n = 23), stroke/transitory ischemic attack (n = 13), myasthenia gravis (n = 3), amyotrophic lateral sclerosis (n = 10), Huntington's chorea (n = 3), myositis/myalgia (n = 5), Bell's palsy (n = 12), transitory global amnesia (n = 1), Alzheimer's disease (n = 2), vascular dementia (n = 4), primary progressive aphasia (n = 1), lumbago/lumboischialgia (n = 11), spinal canal stenosis (n = 2), myelo-dysplastic syndrome (n = 2), cranial nerve palsies (n = 6), Phelan McDermid syndrome (n = 8), fatigue syndrome (n = 10), psychiatric diseases (n = 4), systemic borreliosis (n = 3), dural arteriovenous fistula (n = 1), hypokalemic periodic paralysis (n = 1), neuralgic shoulder amyotrophy (n = 3),

normal pressure hydrocephalus (n = 1), spinal muscular atrophy type 1/3 (n = 3), stiff-person syndrome (n = 3), multiple system atrophy (n = 2), giant cell arteritis (n = 1)

Patients of the Biobank of the Department of Neurology, University Hospital of Ulm, who had received a lumbar puncture from July 2009 to January 2023 were categorized into the 4 groups using medical chart review.

**Table S2. Differences in routine CSF findings and CSF-CXCL13 in the four groups.**

| Parameter            | NIND-NID            | NIND-AIND           | NIND-NPL            | NID-AIND            | NID-NPL                       | AIND-NPL                      |
|----------------------|---------------------|---------------------|---------------------|---------------------|-------------------------------|-------------------------------|
| CSF-CXCL13           | <b>p &lt; 0.001</b> | <b>p &lt; 0.001</b> | <b>p &lt; 0.001</b> | <b>p &lt; 0.001</b> | <b>p = 0.275</b>              | <b>p = 0.134</b>              |
| Leucocyte cell count | <b>p &lt; 0.001</b>           | <b>p = 0.043</b><br>p > 0.05* |
| QAlb                 | <b>p &lt; 0.001</b> | p = 0.631           | <b>p &lt; 0.001</b> | <b>p &lt; 0.001</b> | <b>p = 0.024</b><br>p > 0.05* | <b>p = 0.001</b>              |
| Total protein        | <b>p &lt; 0.001</b> | p = 0.105           | <b>p = 0.008</b>    | <b>p &lt; 0.001</b> | p = 0.133                     | p = 0.156                     |

Mann-Whitney U test and the more precise Dunn's post hoc test\* were used for multiple comparisons between the 4 groups. P-values below 0.05 were considered significant according to Dunn's test. All values are rounded. QAlb: CSF-albumin/serum-albumin (albumin ratio), CSF: cerebrospinal fluid, AIND: autoimmune inflammatory neurological diseases, NPL: CNS-neoplasia, NIND: non-inflammatory neurological diseases; NID: neuroinfectious diseases.

**Figure S1. Analyses of CSF-CXCL13 and gender or age in the NIND group.**

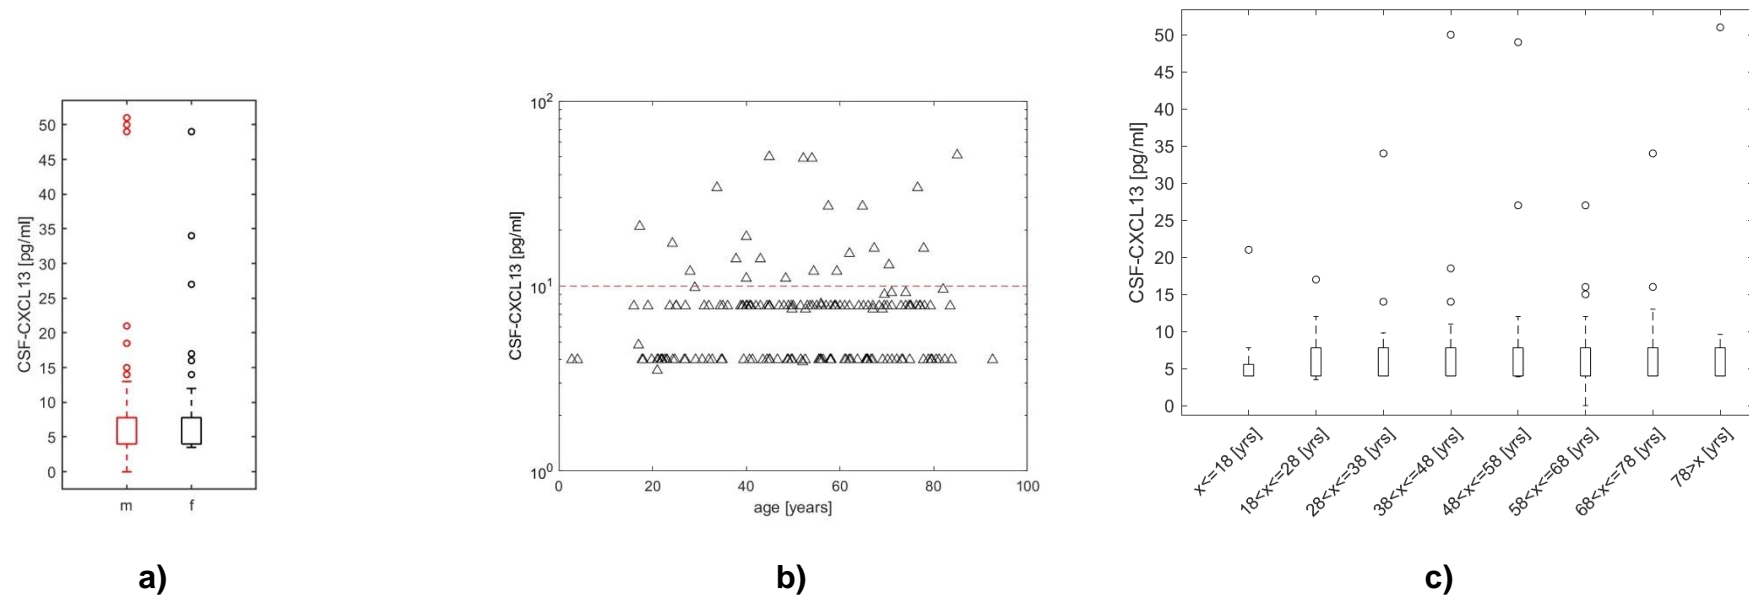

**Figure S1. a)** The patients of the NIND group were divided according to gender (m: masculine and f: feminine). The Mann-Whitney U test was used to compare the values of CSF-CXCL13 in the two groups. No significant difference was detected ( $p = 0.384$ ). **b)** Correlation analyses between CSF-CXCL13 and age in the NIND group were determined using Spearman's rank coefficient ( $r$ ). The dotted lines represent the cut-off for CSF-CXCL13 for non-inflammatory controls ( $<10$  pg/ml) in red. No significant correlation was obtained for CSF-CXCL13 and age ( $r = 0.078$ ). **c)** The patients of the NIND group were grouped by age in steps of ten (yrs: years). Patients below the age of 18 and above 78 were summarized. The Kruskal-Wallis test was used to compare the values of CSF-CXCL13 in the different age-groups. No significant difference was found ( $p = 0.156$ ).

**Figure S2. CSF-CXCL13 value and CSF-specific oligoclonal IgG bands and intrathecal IgM synthesis**

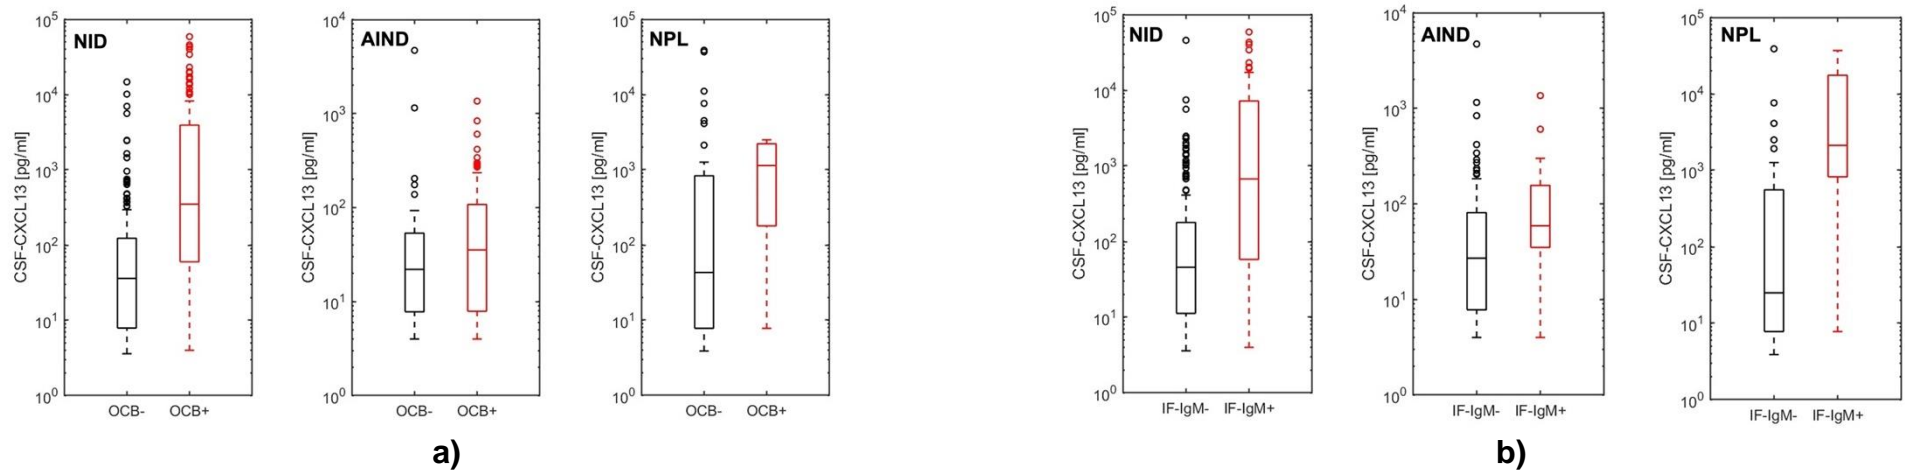

**Figure S2.** The patients of the three different groups NID, AIND, and NPL were grouped **a)** according to CSF-specific oligoclonal IgG bands (OCB+: OCB present and OCB-: OCB absent) and **b)** intrathecal IgM synthesis (IF-IgM+: intrathecal IgM synthesis present and IF-IgM-: intrathecal IgM synthesis absent). The Mann-Whitney U test was applied for possible significant differences regarding CSF-CXCL13 between each positive and negative status. Patients of the NID group with CSF-specific oligoclonal IgG bands and all groups with intrathecal IgM synthesis had significantly higher CSF-CXCL13 values. **a)** NID:  $p < 0.001$ , AIND:  $p = 0.273$ , NPL:  $p = 0.307$  and **b)** NID:  $p < 0.001$ , AIND:  $p = 0.001$ , NPL:  $p = 0.034$ . NID: neuroinfectious diseases, AIND: autoimmune (inflammatory) diseases, NPL: CNS-neoplasia, IF-IgM: intrathecal fraction of IgM (=intrathecal IgM synthesis), OCB: CSF-specific oligoclonal IgG bands.

**Figure S3. Classification of MS/CIS/ON/NMOSD patients according to clinical and radiographic activity and location of the lesions with contrast enhancement in MRI.**

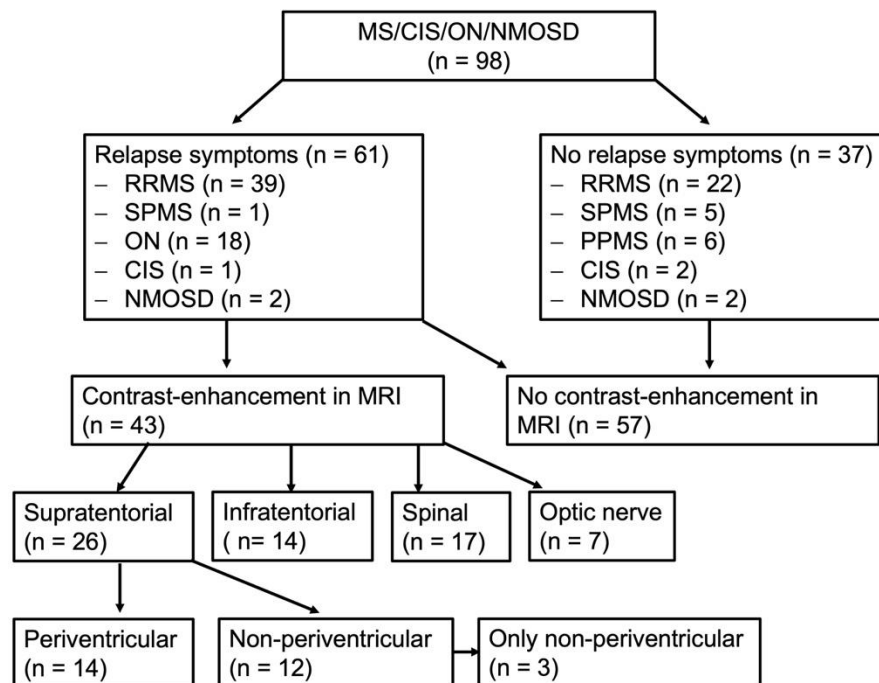

**Figure S3.** Ninety-eight patients with multiple sclerosis (MS), clinically isolated syndrome (CIS), optic neuritis (ON), and neuromyelitis optica spectrum disease (NMOSD) were grouped according to clinical and radiographic activity by location.

**Table S3. Calculation of CSF/serum ratios and indices for CXCL13 in various neurological conditions.**

| <b>Disease</b>                     | <b>S-CXCL13<br/>median (range)<br/>[pg/ml]</b> | <b>CSF-CXCL13<br/>median (range)<br/>[pg/ml]</b> | <b>QAib<br/>median (range)</b>                                             | <b>Q-CXCL13 = CSF-<br/>CXCL13/S-<br/>CXCL13<br/>median (range)</b> | <b>I-CXCL13 =<br/>QCXCL13/<br/>QAib<br/>median (range)</b> |
|------------------------------------|------------------------------------------------|--------------------------------------------------|----------------------------------------------------------------------------|--------------------------------------------------------------------|------------------------------------------------------------|
| LNB                                | 73.0<br>(21 - 304)                             | 1932<br>(142 - 17200)                            | $13.6 \times 10^{-3}$<br>( $3.0 \times 10^{-3}$ - $36.2 \times 10^{-3}$ )  | 24.08<br>(0.08 - 148.32)                                           | 1747.03<br>(7.9 - 12864.4)                                 |
| BCL                                | 50.1<br>(28 - 217)                             | 695<br>(7.8 - 2500)                              | $12.4 \times 10^{-3}$<br>( $5.6 \times 10^{-3}$ - $127.1 \times 10^{-3}$ ) | 8.36<br>(0.11 - 24.35)                                             | 734.6<br>(6.16 - 3676)                                     |
| Viral/I-UP/F/P/B-<br>CNS-D         | 63<br>(7.8 - 160)                              | 36.5<br>(4 - 227)                                | $11.8 \times 10^{-3}$<br>( $4.4 \times 10^{-3}$ - $28.4 \times 10^{-3}$ )  | 0.51<br>(0.03 - 3.22)                                              | 47.96<br>(0.5 - 254.68)                                    |
| MS/ON/CIS/NMOSD;<br>all            | 59.5<br>(7.8 - 158)                            | 23.5<br>(7.8 - 119)                              | $5.46 \times 10^{-3}$<br>( $2.51 \times 10^{-3}$ - $12.7 \times 10^{-3}$ ) | 0.39<br>(0.03 - 1.73)                                              | 67.65<br>(4.82 - 255.02)                                   |
| MS/ON/CIS/NMOSD;<br>intact B-CSF-B | 61<br>(7.8 - 108)                              | 17.5<br>(7.8 - 97)                               | $5.27 \times 10^{-3}$<br>( $2.51 \times 10^{-3}$ - $8.8 \times 10^{-3}$ )  | 0.28<br>(0.03 - 1.43)                                              | 67.65<br>(4.82 - 295.11)                                   |
| AIE/PNS                            | 75<br>(21 - 137)                               | 65<br>(7.8 - 209)                                | $8.8 \times 10^{-3}$<br>( $3.44 \times 10^{-3}$ - $20.8 \times 10^{-3}$ )  | 0.72<br>(0.17 - 5.77)                                              | 98.63<br>(9.33 - 359.48)                                   |
| NIND                               | 64<br>(7.8 - 191)                              | 7.8<br>(-)                                       | $6.8 \times 10^{-3}$<br>( $2.87 \times 10^{-3}$ - $15.3 \times 10^{-3}$ )  | 0.13<br>(0.008 - 0.33)                                             | 18.9<br>(1.48 - 83.01)                                     |

The ratio of CSF-CXCL13 and serum-CXCL13 (Q-CXCL13) was formed to calculate the CXCL13 index (I-CXCL13) in a further step using QAib. Values are indicated as medians and range. QAib: CSF-albumin/serum-albumin (albumin ratio); LNB: Lyme neuroborreliosis, BCL: primary/secondary CNS B cell lymphoma, I-UP: neuroinfectious diseases of unknown pathogens, F: fungal, P: parasitic, B-CNS-D: bacterial CNS disease, MS: multiple sclerosis, ON: optic neuritis, CIS: clinically isolated syndrome, NMOSD:



neuromyelitis optica spectrum disease, B-CSF-B: blood CSF barrier, AIE: autoimmune encephalitis, PNS: paraneoplastic syndrome, NIND: non-inflammatory neurological disease.

**Figure S4.** ROC curve analyses to determine a cut-off value for CSF-CXCL13, Q-CXCL13, and I-CXCL13 for neuroborreliosis.

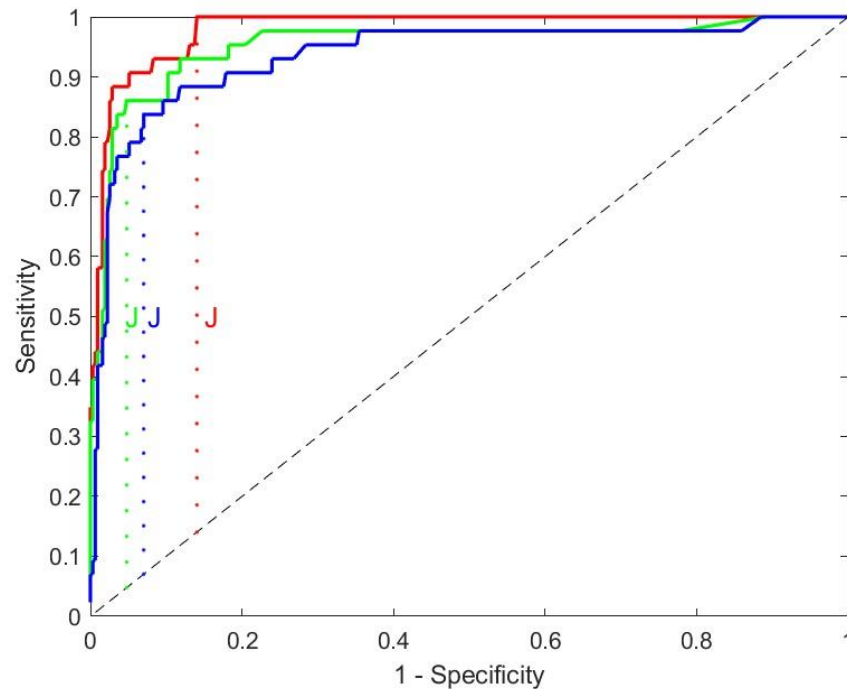

**Figure S4.** After calculation of a CSF-CXCL13/serum-CXCL13 ratio (Q-CXCL13) and an index (I-CXCL13 = Q-CXCL13/QAib,) we performed receiver operating characteristic (ROC) curve analysis for CSF-CXCL13 (red curve), Q-CXCL13 (green curve), and I-CXCL13 (blue curve). We wanted to obtain the optimal cut-off value for these by using the Youden's index to distinguish neuroborreliosis from all other neuroinfectious and autoimmune (inflammatory) diseases as well as non-inflammatory controls with the highest sensitivity and specificity. We also wanted to investigate if CSF-CXCL13 could be used without regarding the corresponding serum value for calculating

ratio and index, respectively. We only had serum-CXCL13 values from 315 patients of the non-LNB group and from 43 LNB-patients. The cut-off after optimization using Youden's index (J; black dotted line) was 126.88 pg/ml for CSF-CXCL13 (red curve), 5.73 for Q-CXCL13 (green curve), and 0.36 for I-CXCL13 (blue curve). Sensitivity, specificity, the area under the curve (AUC), and the Youden's index are indicated in Table S5.

**Table S4. Correlation analyses of CXCL13 and routine CSF findings in neuroborreliosis and MS/ON/CIS/NMOSD.**

| Parameter                              | Neuroborreliosis<br>(Spearman's r; p-value) | MS/ON/CIS/NMOSD<br>(Spearman's r; p-value) |
|----------------------------------------|---------------------------------------------|--------------------------------------------|
| Leucocyte count [ $\mu$ l]             | r = 0.426                                   | r = 0.538                                  |
| Lymphocyte count [ $\mu$ l]            | r = 0.471                                   | r = 0.483                                  |
| Monocyte count [ $\mu$ l]              | r = 0.329                                   | r = 0.021                                  |
| Plasma cell count [ $\mu$ l]           | r = 0.508                                   | r = 0.531                                  |
| QA1b (CSF/S)                           | r = 0.446                                   | r = 0.185                                  |
| CSF-specific oligoclonal IgG bands (+) | p = 0.022*                                  | p = 0.036*                                 |
| Intrathecal IgM synthesis (+)          | p < 0.001*                                  | p = 0.006*                                 |

Correlation analyses between CXCL13 and the routine CSF parameters were determined using Spearman's rank coefficient (r) in neuroborreliosis and MS/ON/CIS/NMOSD. Mann-Whitney U test\* was used to compare CSF-CXCL13 levels if CSF-specific oligoclonal IgG bands or intrathecal IgM synthesis were present or absent. All values are rounded and values <0.05 were considered significant. QA1b: CSF-albumin/serum-albumin (albumin ratio), CSF: cerebrospinal fluid.

**Table S5. Parameters of different ROC-analyses for neuroborreliosis using CSF-CXCL13, Q-CXCL13, and I-CXCL13.**

|                                                  | <b>Cut-off</b> | <b>Sensitivity</b> | <b>Specificity</b> | <b>AUC</b> | <b>Youden's index</b> |
|--------------------------------------------------|----------------|--------------------|--------------------|------------|-----------------------|
| CSF-CXCL13<br>[pg/ml]                            | 127            | 100%               | 85.94%             | 0.98       | 0.86                  |
| CSF-<br>CXCL13/serum-<br>CXCL13 (= Q-<br>CXCL13) | 5.73           | 86.05%             | 95.21%             | 0.95       | 0.81                  |
| Q-CXCL13/QA1b (= I-CXCL13)                       | 0.36           | 83.72%             | 92.97%             | 0.94       | 0.77                  |

After calculation of a CSF-CXCL13/serum-CXCL13 ratio (Q-CXCL13) and an index (I-CXCL13 = Q-CXCL13/QA1b), we performed receiver operating characteristic (ROC) curve analysis for each (see Figure S4). Calculated cut-offs, sensitivity, specificity, the area under the ROC curve (AUC), and the Youden's index are shown here. The area under the ROC curve (AUC) indicating the test performance was highest for CSF-CXCL13 (0.98). Therefore, calculations with CSF-CXCL13 alone might be sufficient.

We only considered patients with measurement of CSF-CXCL13 and serum-CXCL13 in these ROC-analyses (n = 315 for the non-LNB group and n = 43 for LNB-patients).

**Table S6. CSF-CXCL13 cut-offs for neuroborreliosis from the literature implemented in our patient cohort.**

| <b>Reference<br/>[no.]</b>   | <b>Total<br/>individual<br/>count (n)</b> | <b>LNB<br/>count for<br/>ROC-<br/>analysis<br/>(n)<br/>def./prob.</b> | <b>Non-LNB cohort</b>                                                                                  | <b>Method,<br/>manufacturer</b>              | <b>Proposed<br/>cut-off<br/>[pg/ml],<br/>[ng/g<br/>total<br/>protein]*</b> | <b>Sensitivity<br/>(<math>\triangle</math> TPR)<br/>[%]; for<br/>our data<br/>set</b> | <b>Specificity<br/>(<math>\triangle</math> 1-FPR)<br/>[%]; for<br/>our data<br/>set</b> | <b>Youden's<br/>index (J);<br/>for our<br/>data set</b> |
|------------------------------|-------------------------------------------|-----------------------------------------------------------------------|--------------------------------------------------------------------------------------------------------|----------------------------------------------|----------------------------------------------------------------------------|---------------------------------------------------------------------------------------|-----------------------------------------------------------------------------------------|---------------------------------------------------------|
| Hytönen et al., 2014 [13]    | 366                                       | 38 (def. + prob.)                                                     | Viral CNS-inf., NL, MS, non-infl. co.                                                                  | ELISA, Quantikine                            | 415                                                                        | 91.94                                                                                 | 95.94                                                                                   | 0.88                                                    |
| Schmidt et al., 2011 [8]     | 205                                       | 27 (def.)                                                             | Viral/bacterial/fungal CNS-inf. (M/E), MS, prim./sec. CNS-lymphoma, non-infl. co.                      | ELISA, Quantikine                            | 1229                                                                       | 67.74                                                                                 | 97.88                                                                                   | 0.66                                                    |
| van Burgel et al., 2011 [36] | 268                                       | 58 (def. + prob.)                                                     | Viral/bacterial/fungal CNS-inf., MS/ADEM, HIV, non-infl. co.                                           | ELISA, Quantikine; ELISA, Quantikine         | 250                                                                        | 93.55                                                                                 | 92.40                                                                                   | 0.86                                                    |
| Wagner et al., 2018 [10]     | 459                                       | 20 (def.)                                                             | Viral/bacterial CNS-inf., MS, stroke, limbic encephalitis, non-infl. co., intracranial malignancies/TU | ELISA, Euroimmun                             | 93.83                                                                      | 100.00                                                                                | 82.51                                                                                   | 0.83                                                    |
| Markowicz et al., 2018 [31]  | 100                                       | 25 (def.)                                                             | TBE, aseptic M/ME (undefined pathogen)                                                                 | recomBead CXCL13, Mikrogen; ELISA, Euroimmun | 131<br>259                                                                 | 100.00<br>93.65                                                                       | 86.22<br>92.52                                                                          | 0.86<br>0.86                                            |

|                               |                                              |                   |                                                                                                   |                                     |                                                         |                 |                |              |
|-------------------------------|----------------------------------------------|-------------------|---------------------------------------------------------------------------------------------------|-------------------------------------|---------------------------------------------------------|-----------------|----------------|--------------|
| Rupprecht et al., 2018 [17]   | Meta-analysis (18 studies; 2944 individuals) | -                 | -                                                                                                 | ELISA, Quantikine; ELISA, Euroimmun | 91 (cross-sectional studies) 164 (case-control studies) | 100.00<br>95.16 | 82.12<br>87.63 | 0.82<br>0.83 |
| Remy et al., 2017 [21]        | 185                                          | 53 (def.)         | Viral CNS-inf., non-infl. co.                                                                     | ELISA, Quantikine                   | 55                                                      | 100.00          | 75.09          | 0.75         |
| Henningsson et al., 2018 [26] | 191                                          | No ROC-analysis   | Viral CNS-inf., stroke, non-infl. co.                                                             | recomBead CXCL13, Mikrogen          | 160                                                     | 96.77           | 87.63          | 0.84         |
| Cerar et al., 2013 [23]       | 174                                          | 46 (def. + prob.) | TBE, MS, non-infl. co.                                                                            | ELISA, Quantikine                   | 18.9                                                    | 100.00          | 56.89          | 0.57         |
| Tjernberg et al., 2011 [35]   | 261                                          | 124 (def.)        | Head/neck pain, CNP, radiculitis                                                                  | ELISA, Quantikine                   | 142                                                     | 100.00          | 86.75          | 0.87         |
| Wutte et al., 2011 [37]       | 75                                           | No ROC-analysis   | Viral meningitis, CNP, systemic borreliosis, non-infl. co.                                        | ELISA, Quantikine                   | 0<br>500                                                | 100.00<br>88.71 | 0<br>96.64     | 0<br>0.85    |
| Ljøstadt et al., 2008 [30]    | 116                                          | No ROC-analysis   | Viral/bacterial CNS-inf. (M/E), MS, non-infl. co.                                                 | ELISA, Quantikine                   | 125<br>500                                              | 100.00<br>88.71 | 85.87<br>96.64 | 0.86<br>0.85 |
| Knudtzen et al., 2020 [27]    | 619                                          | 37 (def.)         | Viral/bacterial CNS-inf. (M/E), NL, NS, cer. malignancies incl. prim. CNS-lymphoma, non-infl. co. | ELISA, Euroimmun                    | 49                                                      | 100.00          | 71.02          | 0.71         |

|                               |      |                   |                                                                                  |                                                |               |                 |                |              |
|-------------------------------|------|-------------------|----------------------------------------------------------------------------------|------------------------------------------------|---------------|-----------------|----------------|--------------|
| Henningsson et al., 2016 [38] | 132  | 35 (def.)         | Non-infl. co.                                                                    | ELISA, Quantikine; recomBead CXCL13, Mikrogen; | 56<br>158     | 100.00<br>96.77 | 75.27<br>87.63 | 0.75<br>0.84 |
| Lintner et al., 2020 [29]     | 1410 | 29 (def.)         | Viral/bacterial/fungal CNS-inf., MS, intracranial malignancies/TU, non-infl. co. | ELISA, Euroimmun                               | 55.5          | 100.00          | 75.27          | 0.75         |
| Pìcha et al., 2016 [33]       | 244  | 74 (def. + prob.) | Aseptic CNS-inf., Bell's palsy, peripheral neuropathy, non-infl. co.             | ELISA, Quantikine                              | 29            | 100.00          | 62.01          | 0.62         |
| Barstadt et al., 2020 [22]    | 195  | 77 (def. + prob.) | Aseptic meningitis/encephalitis, non-infl. co.                                   | Multiplex bead assay, Millipore corp.          | 213           | 95.16           | 90.63          | 0.86         |
| Eckman et al., 2021 [24]      | 162  | 19 (def. + prob.) | Viral/fungal CNS-inf. (M/E), NL, KRY, MS, non-infl. co.                          | Multiplex bead assay, Thermo Fisher Sci.       | 1726          | 62.90           | 98.59          | 0.61         |
| van Gorkom et al., 2021 [25]  | 156  | 15 (def. + prob.) | Viral/bacterial/fungal CNS-inf., TBC, NL, MS, non-infl. co.                      | ELISA, Quantikine; recomBead CXCL13, Mikrogen  | 85.9<br>252.2 | 100.00<br>93.55 | 80.74<br>92.40 | 0.81<br>0.86 |

|                        |     |           |                                               |                           |      |        |       |      |
|------------------------|-----|-----------|-----------------------------------------------|---------------------------|------|--------|-------|------|
| Leth et al., 2022 [28] | 130 | 31 (def.) | Viral/bacterial CNS-inf., non-infl. co.       | Bead-based assay, Bio-Rad | 50.7 | 100.00 | 72.44 | 0.72 |
| Senel et al., 2010 [9] | 126 | 28 (def.) | Viral/bacterial CNS-inf. (M/E), non-infl. co. | ELISA, Quantikine         | 337* | 77.05  | 93.57 | 0.71 |

The cut-offs from the literature, either determined by ROC analyses or set as in-house cut-off, were implemented in our data set and sensitivity (TPR) and specificity (1-FPR) including Youden's index J were calculated (last three columns of the table). One cut-off (proposed by Senel et al., 2010 [9]) is given as ng/g total protein to compensate for differences in CSF protein. For the implementation of this cut-off in our cohort, the CSF-CXCL13 values were also given in ng/g total protein. Def.: definitive, prob.: probable, TPR: true positivity rate, FPR: false positivity rate, MS: multiple sclerosis, NL: neurosyphilis, TBC: tuberculosis, M/E: meningitis/encephalitis, non-infl. co: non-inflammatory controls, ADEM: acute demyelinating encephalomyelitis, HIV: human immunodeficiency virus, TU: tumor, KRY: cryptococcosis, TBE: tick-borne meningoencephalitis, CNP: cranial nerve palsies.
